# Supplementary material for: Alpha-Tubulin Acetylation in Trypanosoma cruzi: A Dynamic Instability of Microtubules Is Required for Replication and Cell Cycle Progression
Source: PubMed Central journal article supplement (PMC7991793; doi:10.3389/fcimb.2021.642271), 2021-03-11
Supplement: Image_1.pdf [file Image_1.pdf]

## Supplementary Material

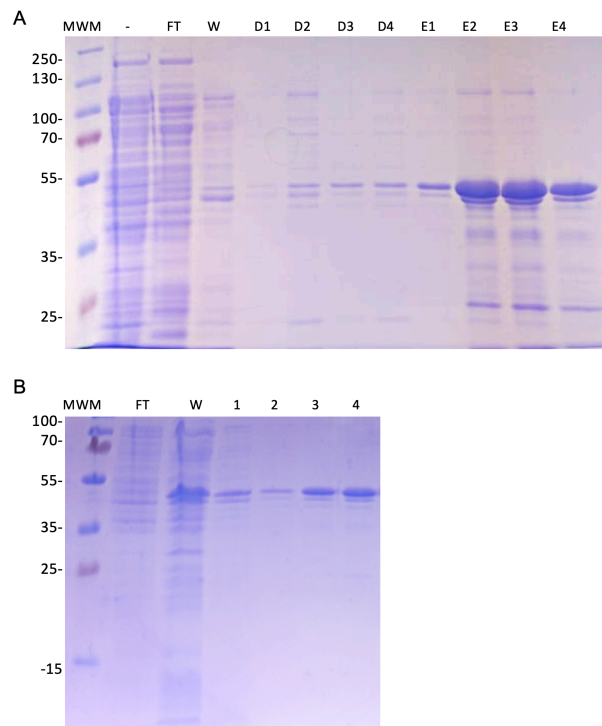

**Supplementary Figure 1.** Recombinant ATAT purifications. **(A)** Coomassie blue-stained SDS-PAGE of the 6xHis-tagged *TcATAT* purification from *E. coli* used for rabbit immunization and polyclonal antibodies production. MWM, molecular weight marker; (-), bacterial lysate uninduced with IPTG; FT, flowthrough obtained after incubating the induced bacterial lysate with the Ni<sup>+</sup>-agarose resin; W, wash; D1-D4, elution with NaH<sub>2</sub>PO<sub>4</sub> 100 mM, Tris 10 mM, Urea 8 M pH 5.9; E1-4, elution with NaH<sub>2</sub>PO<sub>4</sub> 100 mM, Tris 10 mM, Urea 8 M pH 4.5. **(B)** Coomassie blue-stained SDS-PAGE of the HA-tag *TcATAT* purification from *T. cruzi* epimastigotes using an anti-HA resin. This protein was used for the autoacetylation assay. MWM, molecular, weight marker; FT, flowthrough obtained after incubating the resin with the epimastigotes lysate; W, wash; 1-4, elution with HA peptide 0.1 mg/mL.

```

Tb427_030013700 1 MTH-----NVMCDDVLPQLNL-PDGVTRWNANLLEE----ERRLRNSDGH-----DRII
LmjF.25.1150 1 MRIRPPQLTKTKLADEEVPELTLVDPGVSRTGSDLDALLNAARRGGAEAAQQDLERKLC
TcCLB.467287.10 1 MSS-----TSQ-VALLPKLSL-PDGVTWVWDTALEY----ERRCANNVDEHA----VHLM

Tb427_030013700 46 LTINTLGKRSKEAQS LNTILTSVPRLENRDARLYLLCHGGRGVGILKIGVKRLFVVPSP
LmjF.25.1150 61 RTIDILGARSQQAQEIINAVLTSVARLRENSTFRLYLLTONHRGVGILKVGKKLFVTHPV
TcCLB.467287.10 45 QTINILGIRSKEAQC LNTVLTLSVARLRENROARVYLLCQDGYGVGILKMGVKKLFVTHPS

Tb427_030013700 106 HAGLMEIEFPVCLVDFVDTSNQRQGYGKILFEHMLAFERLS-PGDVAIDRPSVKFLAFLR
LmjF.25.1150 121 TCGLVEVDPLCVLDFYVDESCQRQGYGKMLYSHMLKAEHVS RPEVL AIDRPSNKL LGLFLR
TcCLB.467287.10 105 YSSLVEIDPLCVLDFVDTSFQRKGF GKTLFDAMLLNEGLN-PGEVAIDRPSVKFLAFLQ

Tb427_030013700 165 KHYGLVEYTPQSNNFVVFHRYFDKWPQR-GKGHWGNVPT RSLVRPQNCLRVPYPKYQS
LmjF.25.1150 181 KHYGLAAYTPQVNNFVVFHSFFDHTTVSERGKLL-----YOHNETTTT---Q
TcCLB.467287.10 164 KYGLVEYTPQSNNFVVFHRYFDKWPQR-GKGHWGNVPT RSLVRPQNCLRVPYPKYQS

Tb427_030013700 214 QLGTQSGLLEDINQTHPAPSYALRGVVMGHTGPPLDLTNVTQQQKPYHQPFATGRKTSYE
LmjF.25.1150 215 -----RAPSP-----A-----
TcCLB.467287.10 223 TTGPNNNFEEDATHRTPPP-----PPLPPLVLPQGSVTSPP-GVGKKTAYE

Tb427_030013700 274 LOYERYLQSQNCR--PTGNAGYGGNGP ASSAEV R A T N C Q A R R R T S P T R S G V P Y N I I N G S
LmjF.25.1150 221 -----R--A S P F P S S A N A T V A I G G A K A K N W T P -----
TcCLB.467287.10 267 LOYEEYLREQAYRRRQGGDPRLQVPVNPVSSSEI VA A S C G A R R R M S P T R S G V Q Y N I I S G T

```

**Supplementary Figure 2.** Multiple sequence alignment of *TcATAT* (TcCLB.467287.10) and its homologues in *Trypanosoma brucei* (Tb427\_030013700) and *Leishmania major* (LmjF.25.1150) using T-coffee server and colored with Boxshade. The acetyltransferase domain is boxed in green.

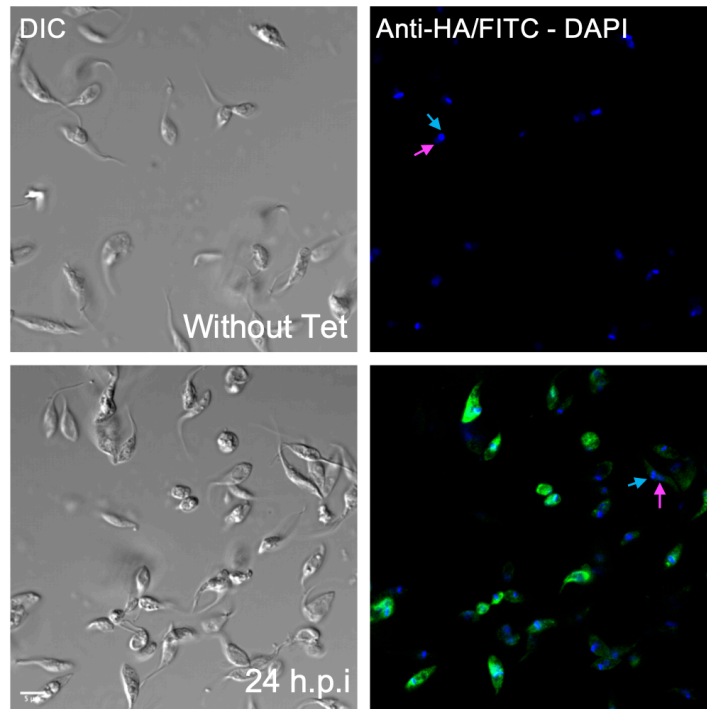

**Supplementary Figure 3.** Immunolocalization of ATAT-HA with rat monoclonal anti-HA antibodies in Dm28c *pTcINDEX-GW* ATAT-HA epimastigotes uninduced (Without tet) and induced with 0.5  $\mu\text{g/ml}$  tetracycline 24 hours post-induction (h.p.i). Bar: 5  $\mu\text{m}$ . DAPI was used as nucleus and kinetoplast marker. The light blue arrow indicates the kinetoplast and the pink arrow indicates the nucleus.

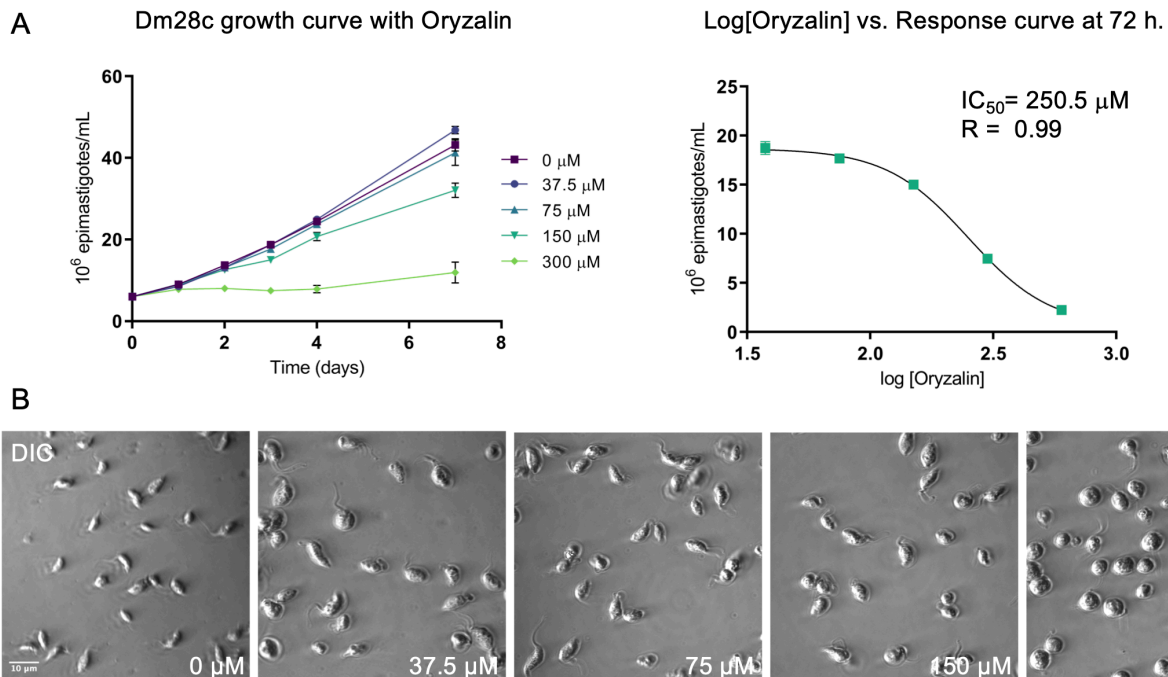

**Supplementary Figure 4.** (A) Growth curve of Dm28c epimastigotes in the presence of increasing concentrations of Oryzalin (0-300  $\mu\text{M}$ ) (left panel) and number of parasites *versus* the log [Oryzalin]

at 72 h (right panel). The latter plot was fitted with the non-parametric regression log(inhibitor) vs. response -Variable slope (four parameters) in GraphPad Prism version 8.0 to obtain the  $IC_{50}$  value and the  $R^2$  of the fit. **(B)** DIC images of the morphological changes in Dm28c epimastigotes with different concentrations of Oryzalin at 72 hours. Bar = 10  $\mu$ m.

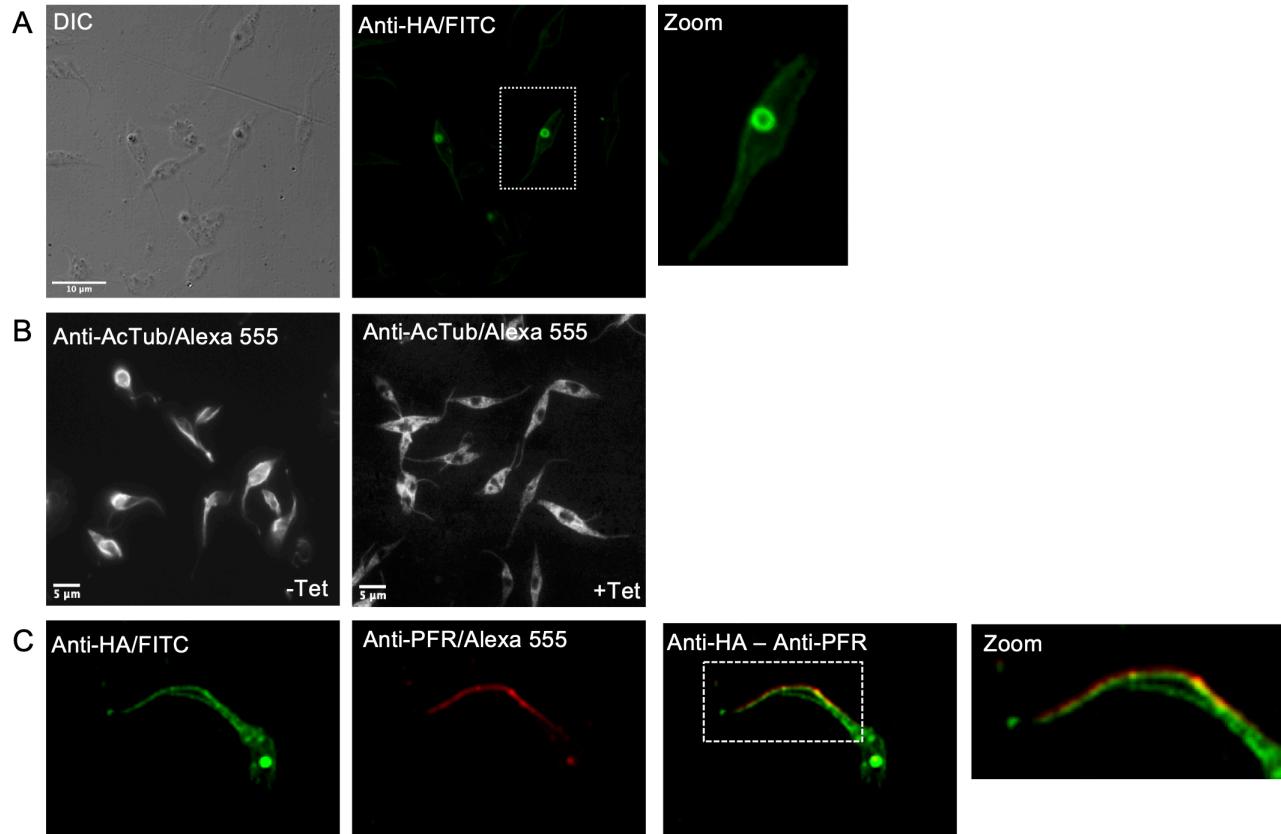

**Supplementary Figure 5.** (A) Immunolocalization of ATAT-HA with rat monoclonal anti-HA antibodies in isolated cytoskeletons of Dm28c pTcINDEX-GW ATAT-HA epimastigotes induced with 0.5  $\mu$ g/ml tetracycline for 24 h (B) Immunolocalization of acetylated a-tubulin with mouse monoclonal anti-acetylated a-tubulin (anti-AcTub) in isolated cytoskeletons of Dm28c pTcINDEXGW ATAT-HA epimastigotes cytoskeletons uninduced (-Tet) and induced with 0.5  $\mu$ g/ml tetracycline for 24 h (+ Tet). (C) Immunolocalization of ATAT-HA with rat monoclonal anti-HA antibodies and mouse 5 polyclonal anti-paraflagellar rod 2 from *T. cruzi* (anti-PFR) in isolated cytoskeletons of Dm28c pTcINDEX-GW ATAT-HA epimastigotes induced with 0.5  $\mu$ g/ml tetracycline for 24 h.

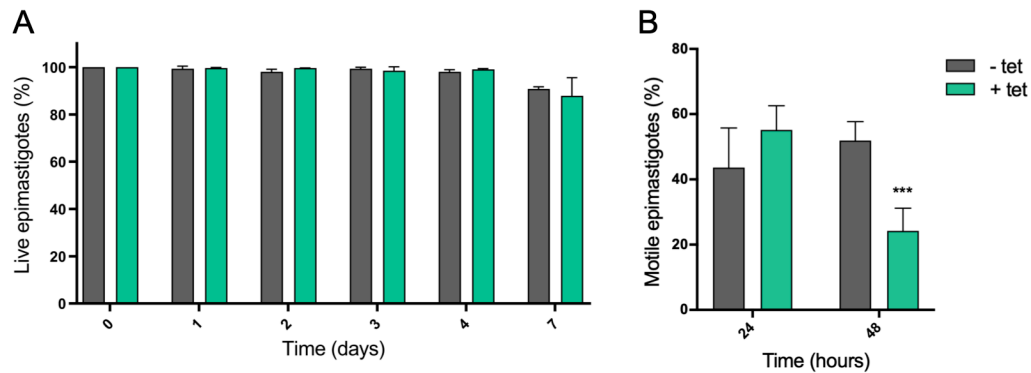

**Supplementary Figure 6.** (A) Viability (% of live epimastigotes) of Dm28c *pTcINDEX-GW* ATAT-HA epimastigotes uninduced (grey bar, -tet) and induced with 0.5  $\mu\text{g/ml}$  tetracycline (green bar, +tet) determined by counting live cells with a hemacytometer using Erythrosin B staining for 7 days. (B) Epimastigotes movements were examined using the computer-assisted semen analysis (CASA) system (Microptic, SCA evolution). The mean path velocity (VAP,  $\mu\text{m/sec}$ ) was plotted at 24 and 48 h.p.i. without (grey bar, -tet) and with 0.5  $\mu\text{g/ml}$  tetracycline (green bar, +tet). Experiments were performed in triplicates.

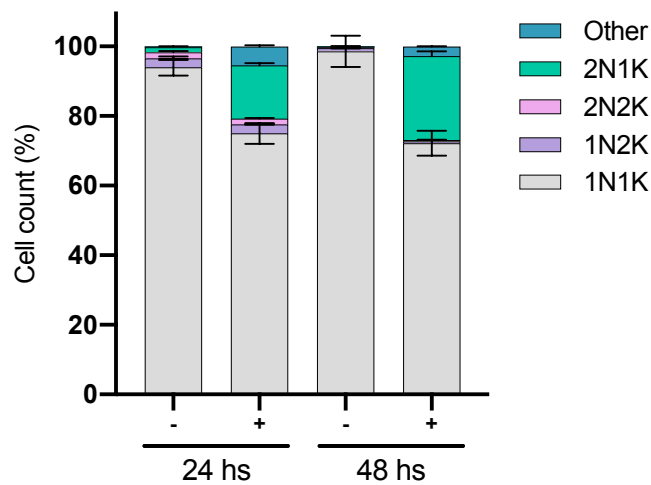

**Supplementary Figure 7.** Nucleus/Kinetoplast content (N/K) of Dm28c *pTcINDEX-GW* ATAT-HA epimastigotes cultures in the absence (-) or presence (+) of 0.5  $\mu\text{g/ml}$  tetracycline at different time points (24 and 48 hours). Data from three independent experiments were considered in the analysis ( $n = 300$  cells for each column).
